# Supplementary material
Source: Springer Nature journal article supplement (https://www.springermedizin.de/resource/supplementary/12947_2007_176_MOESM3_ESM.pdf/9556392)

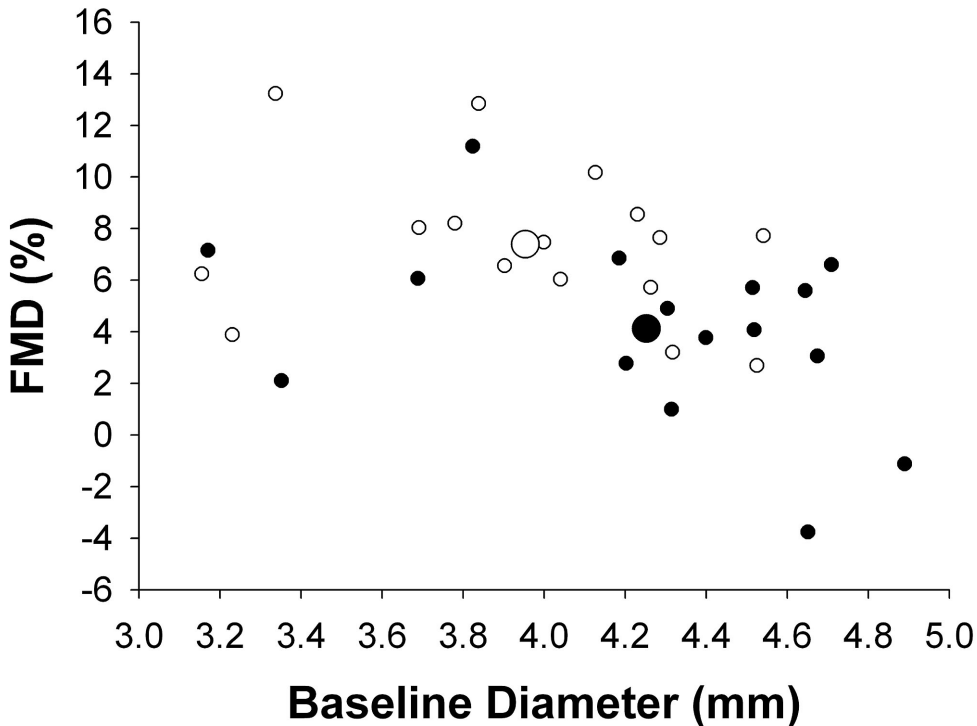

- Pre-exercise
- Post-exercise
- Pre-exercise Mean
- Post-exercise Mean

Supplement: MOESM3 [file 9556392]
